# Supplementary material
Source: PubMed Central journal article supplement (PMC4846893)
Supplement: ajtr0008-0419-f7.pdf [file ajtr0008-0419-f7.pdf]

## Generation of iPSCs from hPMSCs

**Supplementary Table 1.** Primer sets for PCR reactions

| Genes            | Sequence (5' to 3')                                            |
|------------------|----------------------------------------------------------------|
| For RT-PCR       |                                                                |
| GAPDH            | GTGGACCTGACCTGCCGTCT<br>GGAGGAGTGGGTGTCGCTGT                   |
| OCT4             | CAGTGCCCGAAACCCACAC<br>GGAGACCCAGCAGCCTCAA                     |
| NANOG            | TTTGAAGCTGCTGGGGAAG<br>GATGGGAGGAGGGGAGAGGA                    |
| PDX-1            | ATCTCCCATACGAAGTGCC<br>CGTGAGCTTTGGTGGATTTCAT                  |
| AFP              | GAATGCTGCAAACCTGACCACGCTGGAAC<br>TGGCATTCA AGAGGGTTTTAGTCTGG A |
| GATA4            | TCCAAACCAGAAAACGGAAGC GCCCGTAGTGAGATGACAGG                     |
| PAX6             | ACCCATTATCCAGATGTGTTTGCCCGAG<br>ATGGTGAAGCTGGGCATAGGCGGCAG     |
| MAP2             | AATAGACCTAAGCCATGTGACATCC<br>ATGGTGAAGCTGGGCATAGGCGGCAG        |
| BRACHYURY        | GCCCTCTCCCTCCCCTCCACGCACAG<br>CGGCGCCGTTGCTCACAGACCACAGG       |
| Endogenous OCT4  | GTACTCCTCGGTCCCTTTCC CAAAAACCCTGGCACAACCT                      |
| Exogenous OCT4   | ACTTCACTGCACTGTACTCCTC CATAGCGTAAAAGGAGCAACA                   |
| Endogenous SOX2  | CATGTCCCAGCACTACCAGA GTCATTTGCTGTGGGTGATG                      |
| Exogenous SOX2   | ATGTCCCAGCACTACCAG CTGACAGCCATGGTGAAG                          |
| Endogenous LIN28 | GTTTTGAGGAGCAGGCAGAG<br>ACCCTCACTTGCAATTTGGAC                  |
| Exogenous LIN28  | AGAAATCCACAGCCCTACCC<br>ACCCTCACTTGCAATTTGGAC                  |
